# Supplementary material
Source: HighWire-hosted journal article supplement (https://jmg.bmj.com/content/54/10/657)
Supplement: inline-supplementary-material-1 [file inline-supplementary-material-1.docx]

**Supplementary table 1** Correlation of the genetic severity score with phenotypic data derived from published NF2 cohorts

| Genetic Severity: | 2A mild | 2B moderate | 3 Severe | Statistic | | Cohort |
| --- | --- | --- | --- | --- | --- | --- |
| Number of Patients (N=30) | 12 | 3 | 15 | - |  | Kluwe et al (1996) |
| Mean (SD): Age at time of diagnosis | 26 (12) | 12 (14) | 14 (7) | rs(28) =- .47,  *p* = .004 |  |
| N (%) Cranial Tumour | 2(17%) | 2(67%) | 12(80%) | χ2(1) = 10.3,  p =.001 |  |
| N (%) Spinal Tumour | 7 (64%) | 3 (100%) | 15 (100%) | χ2(1) = 6.6,  p =.01 |  |
| Number of Patients (N=50) | 20 | 10 | 20 | - |  | Ruttledge et al (1996) |
| Mean (SD): Age at time of diagnosis | 30 (12) | 20 (7) | 19 (8) | rs(48) =- .45,  *p* = .001 |  |
| N (%) Meningioma at diagnosis | 4 (20%) | 6 (60%) | 15 (75%) | χ2(1) = 11.9,  p =.001 |  |
| Number of Patients (N=80) | 32 | 13 | 35 | - |  | Kluwe and Ruttledge combined cohorts |
| Mean (SD): Age at time of diagnosis | 28 (12) | 18 (8) | 17 (8) | rs(78) =- .47,  *p* = .001 |  |
